# Supplementary material for: Bimetallic [Co/K] hydrogen evolution catalyst for electrochemical terminal C-H functionalization
Source: Research Square preprint supplement (doi:10.21203/rs.3.rs-6460107/v1), 2025-05-04

## checkCIF/PLATON report

Structure factors have been supplied for datablock(s) 20241127-zs\_auto

THIS REPORT IS FOR GUIDANCE ONLY. IF USED AS PART OF A REVIEW PROCEDURE FOR PUBLICATION, IT SHOULD NOT REPLACE THE EXPERTISE OF AN EXPERIENCED CRYSTALLOGRAPHIC REFEREE.

No syntax errors found.      CIF dictionary      Interpreting this report

### Datablock: 20241127-zs\_auto

---

|                        |                                          |                                                                 |
|------------------------|------------------------------------------|-----------------------------------------------------------------|
| Bond precision:        | C-C = 0.0047 Å                           | Wavelength=1.54184                                              |
| Cell:                  | a=11.6744 (2)<br>alpha=90                | b=21.7762 (4)<br>beta=106.474 (2)<br>c=9.08477 (18)<br>gamma=90 |
| Temperature:           | 100 K                                    |                                                                 |
|                        | Calculated                               | Reported                                                        |
| Volume                 | 2214.76 (7)                              | 2214.75 (8)                                                     |
| Space group            | P 21/c                                   | P 1 21/c 1                                                      |
| Hall group             | -P 2ybc                                  | -P 2ybc                                                         |
| Moiety formula         | 2 (C20 H19.50 Co K N2 O7),<br>2 (C H4 O) | C40 H39 Co2 K2 N4 O14, 2 (C<br>H4 O)                            |
| Sum formula            | C42 H47 Co2 K2 N4 O16                    | C42 H47 Co2 K2 N4 O16                                           |
| Mr                     | 1059.90                                  | 1059.89                                                         |
| Dx, g cm <sup>-3</sup> | 1.589                                    | 1.589                                                           |
| Z                      | 2                                        | 2                                                               |
| Mu (mm <sup>-1</sup> ) | 8.214                                    | 8.214                                                           |
| F000                   | 1094.0                                   | 1094.0                                                          |
| F000'                  | 1089.44                                  |                                                                 |
| h, k, lmax             | 14, 27, 11                               | 14, 26, 11                                                      |
| Nref                   | 4765                                     | 4622                                                            |
| Tmin, Tmax             | 0.906, 0.921                             | 0.391, 1.000                                                    |
| Tmin'                  | 0.849                                    |                                                                 |

Correction method= # Reported T Limits: Tmin=0.391 Tmax=1.000  
AbsCorr = MULTI-SCAN

Data completeness= 0.970      Theta(max)= 78.449

R(reflections)= 0.0754 ( 4195)

wR2(reflections)=  
0.1681 ( 4622)

S = 1.095

Npar= 302

---

The following ALERTS were generated. Each ALERT has the format

**test-name\_ALERT\_alert-type\_alert-level.**

Click on the hyperlinks for more details of the test.

---

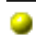

### Alert level C

PLAT042\_ALERT\_1\_C Calc. and Reported MoietyFormula Strings Differ Please Check  
Calc: 2(C20 H19.50 Co K N2 O7), 2(C H4 O)  
Rep.: C40 H39 Co2 K2 N4 O14, 2(C H4 O)

PLAT414\_ALERT\_2\_C Short Intra D-H..H-X H2 ..H1AD . 1.98 Ang.  
x,y,z = 1\_555 Check

PLAT906\_ALERT\_3\_C Large K Value in the Analysis of Variance ..... 3.500 Check

PLAT911\_ALERT\_3\_C Missing FCF Refl Between Thmin & STh/L= 0.600 6 Report  
3 0 0, 2 25 1, 9 0 6, 9 1 6, -8 2 10, -8 4 10,

PLAT976\_ALERT\_2\_C Check Calcd Resid. Dens. 0.91Ang From O2 . -0.43 eA-3

PLAT977\_ALERT\_2\_C Check Negative Difference Density on H2 . -0.41 eA-3

---

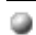

### Alert level G

PLAT002\_ALERT\_2\_G Number of Distance or Angle Restraints on AtSite 6 Note

PLAT003\_ALERT\_2\_G Number of Uiso or U(i,j) Restrained non-H-Atoms 2 Report

PLAT004\_ALERT\_5\_G Polymeric Structure Found with Maximum Dimension 1 Info

PLAT007\_ALERT\_5\_G Number of Unrefined Donor-H Atoms ..... 1 Report  
H2

PLAT083\_ALERT\_2\_G SHELXL Second Parameter in WGHT Unusually Large 15.14 Why ?

PLAT164\_ALERT\_4\_G Nr. of Refined C-H H-Atoms in Heavy-Atom Struct. 3 Note

PLAT171\_ALERT\_4\_G The CIF-Embedded .res File Contains EADP Records 1 Report

PLAT172\_ALERT\_4\_G The CIF-Embedded .res File Contains DFIX Records 3 Report

PLAT186\_ALERT\_4\_G The CIF-Embedded .res File Contains ISOR Records 1 Report

PLAT299\_ALERT\_4\_G Atom Site Occupancy Constrained at ..... 0.5 Check  
C1A C1B C2A C2B H1AA H1B H1AB H2A  
H2B

PLAT301\_ALERT\_3\_G Main Residue Disorder .....(Resd 1) 6% Note

PLAT432\_ALERT\_2\_G Short Inter X...Y Contact O2 ..C1A . 3.01 Ang.  
x,1/2-y,1/2+z = 4\_566 Check

PLAT720\_ALERT\_4\_G Number of Unusual/Non-Standard Labels ..... 11 Note  
COAA COOQ H1AA H1AB C1AA H1AC H1AD H1AE  
H00A H00B H00C

PLAT860\_ALERT\_3\_G Number of Least-Squares Restraints ..... 19 Note

PLAT883\_ALERT\_1\_G Absent Datum for \_atom\_sites\_solution\_primary .. Please Do !

PLAT910\_ALERT\_3\_G Missing # of FCF Reflection(s) Below Theta(Min). 2 Note  
1 0 0, 0 2 0,

PLAT912\_ALERT\_4\_G Missing # of FCF Reflections Above STh/L= 0.600 122 Note

PLAT933\_ALERT\_2\_G Number of HKL-OMIT Records in Embedded .res File 5 Note  
0 2 0, 3 0 0, 2 25 1, -8 4 10, 1 0 0,

PLAT969\_ALERT\_5\_G The 'Henn et al.' R-Factor-gap value ..... 6.518 Note  
Predicted wR2: Based on SigI\*\*2 2.58 or SHELX Weight 15.35

PLAT978\_ALERT\_2\_G Number C-C Bonds with Positive Residual Density. 1 Info

---

0 **ALERT level A** = Most likely a serious problem - resolve or explain

0 **ALERT level B** = A potentially serious problem, consider carefully

6 **ALERT level C** = Check. Ensure it is not caused by an omission or oversight

20 **ALERT level G** = General information/check it is not something unexpected

2 ALERT type 1 CIF construction/syntax error, inconsistent or missing data

- 9 ALERT type 2 Indicator that the structure model may be wrong or deficient
  - 5 ALERT type 3 Indicator that the structure quality may be low
  - 7 ALERT type 4 Improvement, methodology, query or suggestion
  - 3 ALERT type 5 Informative message, check
- 

## Validation response form

Please find below a validation response form (VRF) that can be filled in and pasted into your CIF.

```
# start Validation Reply Form
_vrf_PLAT042_20241127-zs_auto
;
PROBLEM: Calc. and Reported MoietyFormula Strings Differ      Please Check
RESPONSE: ...
;
_vrf_PLAT414_20241127-zs_auto
;
PROBLEM: Short Intra D-H..H-X      H2      ..H1AD      .      1.98 Ang.
RESPONSE: ...
;
_vrf_PLAT906_20241127-zs_auto
;
PROBLEM: Large K Value in the Analysis of Variance .....      3.500 Check
RESPONSE: ...
;
_vrf_PLAT911_20241127-zs_auto
;
PROBLEM: Missing FCF Refl Between Thmin & STh/L=      0.600      6 Report
RESPONSE: ...
;
_vrf_PLAT976_20241127-zs_auto
;
PROBLEM: Check Calcd Resid. Dens.  0.91Ang From O2      .      -0.43 eA-3
RESPONSE: ...
;
_vrf_PLAT977_20241127-zs_auto
;
PROBLEM: Check Negative Difference Density on H2      .      -0.41 eA-3
RESPONSE: ...
;
# end Validation Reply Form
```

---

It is advisable to attempt to resolve as many as possible of the alerts in all categories. Often the minor alerts point to easily fixed oversights, errors and omissions in your CIF or refinement strategy, so attention to these fine details can be worthwhile. In order to resolve some of the more serious problems it may be necessary to carry out additional measurements or structure refinements. However, the purpose of your study may justify the reported deviations and the more serious of these should normally be commented upon in the discussion or experimental section of a paper or in the "special\_details" fields of the CIF. checkCIF was carefully designed to identify outliers and unusual parameters, but every test has its limitations and alerts that are not important in a particular case may appear. Conversely, the absence of alerts does not guarantee there are no aspects of the results needing attention. It is up to the individual to critically assess their own results and, if necessary, seek expert advice.

### **Publication of your CIF in IUCr journals**

A basic structural check has been run on your CIF. These basic checks will be run on all CIFs submitted for publication in IUCr journals (*Acta Crystallographica*, *Journal of Applied Crystallography*, *Journal of Synchrotron Radiation*); however, if you intend to submit to *Acta Crystallographica Section C* or *E* or *IUCrData*, you should make sure that full publication checks are run on the final version of your CIF prior to submission.

### **Publication of your CIF in other journals**

Please refer to the *Notes for Authors* of the relevant journal for any special instructions relating to CIF submission.

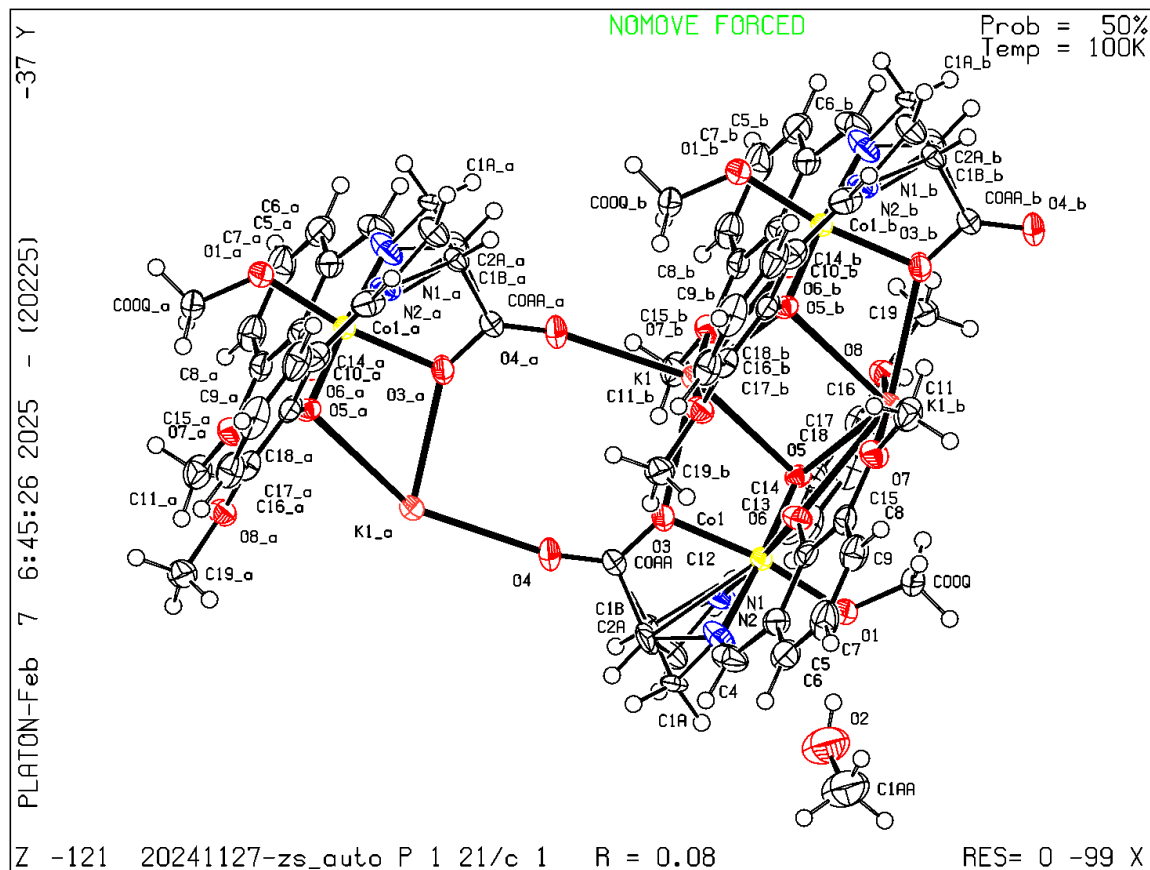

Supplement: Supplementary file 1 [file 132da2cb5b7f7d9da4c88584.pdf]
